# Supplementary material for: Simultaneous transcription of duplicated var2csa gene copies in individual Plasmodium falciparum parasites
Source: PubMed Central journal article supplement (PMC2784332; doi:10.1186/gb-2009-10-10-r117), 2009-10-22

Supplementary figure 1

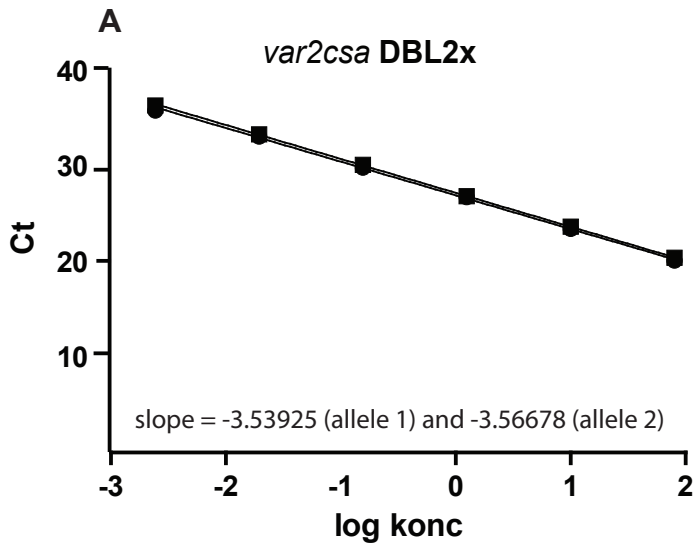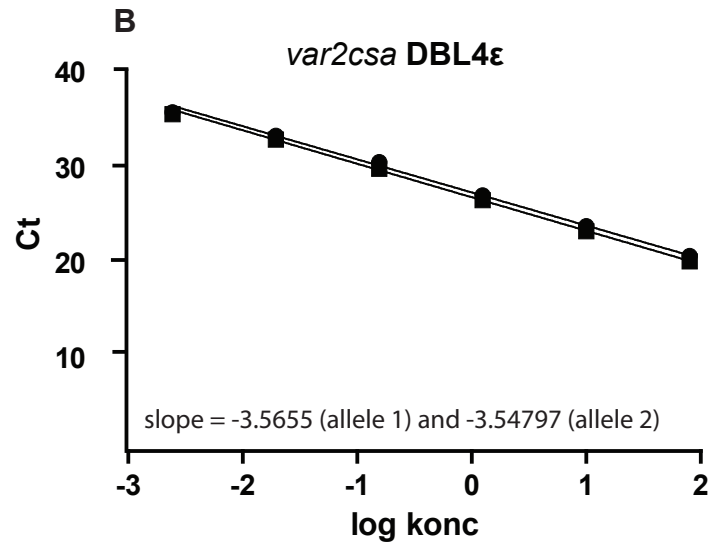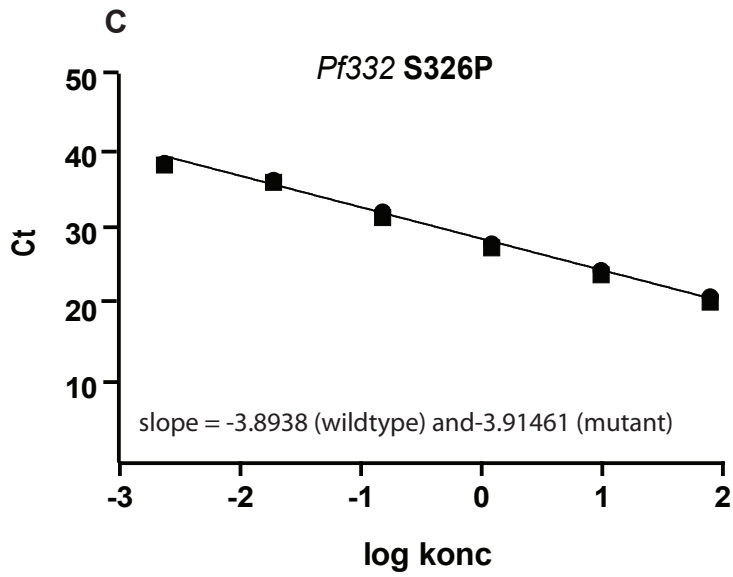

Supplement: gb-2009-10-10-r117-S1.pdf [file gb-2009-10-10-r117-S1.pdf]
